# Supplementary material for: Association between HLA DNA Variants and Long-Term Response to Anti-TNF Drugs in a Spanish Pediatric Inflammatory Bowel Disease Cohort
Source: MDPI journal article supplement (doi:10.3390/ijms24021797), 2023-01-16
Supplement: s1 [file s1]

**Table S1.** Clinical characteristics of pediatric patients classified according to their haplotypes and risk to failure of anti-TNF drug.

| Characteristics                                                     | Low risk (n=109)        | Medium risk (n=133) | High risk (n=98)       | P value      |
|---------------------------------------------------------------------|-------------------------|---------------------|------------------------|--------------|
| Sex                                                                 |                         |                     |                        |              |
| Male, n (%)                                                         | 69 (33.7%)              | 79 (38.5%)          | 57 (27.8%)             | 0.478        |
| Female, n (%)                                                       | 40 (29.6%)              | 54 (40%)            | 41 (30.4%)             |              |
| Age (years)                                                         |                         |                     |                        |              |
| At diagnosis, median (IQR, range)                                   | 11.2 (4.6, 0.9-16.3)    | 11.4 (4.4, 2-17.29) | 10.7 (3.8, 0.7-17.3)   | 0.426        |
| At start of treatment, median (IQR, range)                          | 12.1 (4.5, 1.4-17.3)    | 12.1 (4.4, 3-17.5)  | 12.3 (3.6, 1.1-17.3)   | 0.582        |
| Months from diagnosis to initiation of therapy, median (IQR, range) | 6.1 (17.6, 0-129.6)     | 6.1 (11.1, 0-106)   | 9.8 (16.9, 0-125.8)    | 0.427        |
| Type of IBD                                                         |                         |                     |                        |              |
| CD, n (%)                                                           | 78 (32.5%)              | 99 (41.3%)          | 63 (26.3%)             | 0.273        |
| UC, n (%)                                                           | 29 (31.2%)              | 32 (34.4%)          | 32 (34.4%)             |              |
| IC, n (%)                                                           | 2 (28.6%)               | 2 (28.6%)           | 3 (42.9%)              |              |
| First or second biological treatment                                |                         |                     |                        |              |
| 1 <sup>st</sup> , n (%)                                             | 105 (33%)               | 126 (39.6%)         | 87 (27.4%)             | <b>0.034</b> |
| 2 <sup>nd</sup> , n (%)                                             | 4 (18.2%)               | 7 (31.8%)           | 11 (50%)               |              |
| Drug                                                                |                         |                     |                        |              |
| Infliximab, n (%)                                                   | 70 (30.7%)              | 93 (40.8%)          | 65 (28.5%)             | 0.768        |
| Adalimumab, n (%)                                                   | 39 (34.8%)              | 40 (35.7%)          | 33 (29.5%)             |              |
| Response to anti-TNF                                                |                         |                     |                        |              |
| Yes, n(%)                                                           | 94 (34.8%)              | 106 (39.3%)         | 70 (25.9%)             | <b>0.010</b> |
| No, n (%)                                                           | 15 (21.4%)              | 27 (38.6%)          | 28 (40%)               |              |
| Months until failure, median (IQR, range) (n=70)                    | 26.6 (37.5, 0.47-103.5) | 23 (32.2, 0.46-108) | 18.5 (29.8, 0.53-92.4) | 0.746        |
| Concomitant immunomodulator (n=330)                                 |                         |                     |                        |              |
| Yes, n (%)                                                          | 92 (32.2%)              | 109 (38.1%)         | 85 (29.7%)             | 1            |
| No, n (%)                                                           | 12 (27.3%)              | 21 (47.7%)          | 11 (25%)               |              |
| Type of immunotherapy (n=283)                                       |                         |                     |                        |              |
| Azathioprine                                                        | 84 (31.6%)              | 102 (38.3%)         | 80 (30.1%)             | 0.616        |
| Mercaptopurine                                                      | 1 (33.3%)               | 1 (33.3%)           | 1 (33.3%)              |              |
| Methotrexate                                                        | 6 (42.9%)               | 5 (35.7%)           | 3 (21.4%)              |              |

Bold, *P* value < 0.05; IQR, Interquartile range; CD, Crohn's disease; UC, Ulcerative colitis; IC, indeterminate colitis.
